# Supplementary material
Source: PubMed Central journal article supplement (PMC7811187)
Supplement: NIHMS1659714-supplement-Supplement.pdf [file NIHMS1659714-supplement-Supplement.pdf]

**Supplemental Table 1.** Dementia diagnosis codes

| <b>ICD-9</b>         | <b>ICD-10</b>        | <b>Description</b>                                    |
|----------------------|----------------------|-------------------------------------------------------|
| 290.4X               | F01.X                | Vascular dementia                                     |
| 294.1X               | F02.X                | Dementia classified elsewhere (any specific etiology) |
| 294.2X               | F03.X                | Dementia unspecified                                  |
| 331.0                | G30.X                | Alzheimer's disease                                   |
| 331.11               | G31.01               | Pick's Disease                                        |
| 331.19               | G31.09               | Frontal dementia                                      |
| 331.82               | G31.83               | Dementia with Lewy bodies                             |
| 290.X                | No direct equivalent | Senile dementia                                       |
| No direct equivalent | F03.9X               | Dementia unspecified                                  |

**Supplemental Table 2.** Invasive procedure codes

| <b>Procedure</b>                       | <b>ICD-9</b> | <b>ICD-10</b> | <b>Clinical classification software code</b> |
|----------------------------------------|--------------|---------------|----------------------------------------------|
| Tracheostomy                           | 311          | 0B110F4       | 34                                           |
|                                        | 3121         | 0B110Z4       |                                              |
|                                        | 3129         | 0B113F4       |                                              |
|                                        |              | 0B113Z4       |                                              |
|                                        |              | 0B114F4       |                                              |
|                                        |              | 0B114Z4       |                                              |
| Respiratory intubation and ventilation | 9390         | 09HN7BZ       | 216                                          |
|                                        | 9392         | 09HN8BZ       |                                              |
|                                        | 9601         | 0BH13EZ       |                                              |
|                                        | 9602         | 0BH17EZ       |                                              |
|                                        | 9603         | 0BH18EZ       |                                              |
|                                        | 9604         | 0CHY7BZ       |                                              |
|                                        | 9605         | 0CHY8BZ       |                                              |
|                                        | 9670         | 0DH57BZ       |                                              |
|                                        | 9671         | 0DH58BZ       |                                              |
|                                        | 9672         | 0WHQ73Z       |                                              |
|                                        |              | 0WHQ7YZ       |                                              |
|                                        |              | 5A09357       |                                              |
|                                        |              | 5A09457       |                                              |
|                                        |              | 5A09557       |                                              |
|                                        | 5A1935Z      |               |                                              |
|                                        | 5A1945Z      |               |                                              |
|                                        | 5A1955Z      |               |                                              |
| Gastrostomy                            | 431          | 0D16074       | 71                                           |
|                                        | 4311 4319    | 0D160J4       |                                              |
|                                        | 432          | 0D160K4       |                                              |
|                                        | 4432         | 0D160Z4       |                                              |
|                                        |              | 0D163J4       |                                              |
|                                        |              | 0D16474       |                                              |
|                                        |              | 0D164J4       |                                              |
|                                        |              | 0D164K4       |                                              |
|                                        |              | 0D164Z4       |                                              |
|                                        |              | 0D16874       |                                              |
|                                        |              | 0D168J4       |                                              |
|                                        |              | 0D168K4       |                                              |
|                                        |              | 0D168Z4       |                                              |
|                                        |              | 0DH60UZ       |                                              |
|                                        |              | 0DH63UZ       |                                              |
|                                        |              | 0DH64UZ       |                                              |
